# Supplementary material
Source: Springer Nature journal article supplement (https://www.springermedizin.de/resource/supplementary/12891_2008_553_MOESM1_ESM.pdf/9511314)

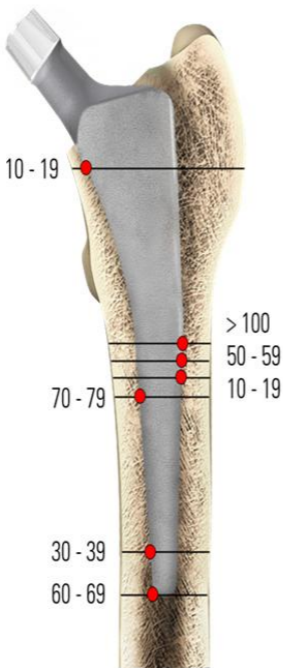

**A**

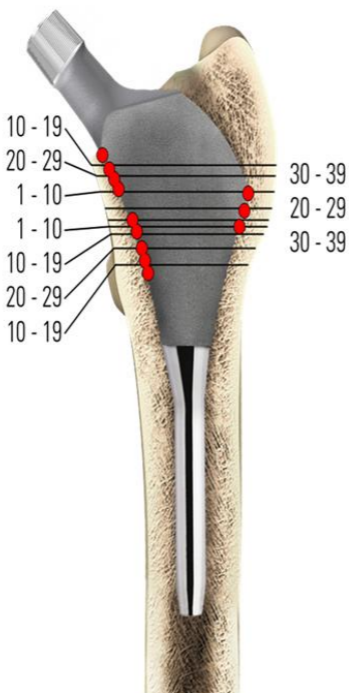

**B**

Supplement: MOESM1 [file 9511314]
